# Supplementary material for: DNA-scaffolded silver nanoclusters as an on–off label-free fluorescence probe for the selective detection of endonuclease activity and inhibition
Source: Royal Society of Chemistry journal article supplement (doi:10.1039/c5ay01946j), 2015-01-01
Supplement: c5ay01946j1.pdf [file c5ay01946j1.pdf]

**Supplementary materials for:**

**DNA-scaffolded silver nanoclusters as an on-off label-free  
fluorescence probe for the selective detection of endonuclease activity  
and inhibition**

Wen Yang, Jianniao Tian\*, Lijun Wang, Yanchun Zhao\*, Shulin Zhao

Key Laboratory for the Chemistry and Molecular Engineering of Medicinal Resources  
(Ministry of Education of China), School of Chemistry and Pharmaceutical Science of  
Guangxi Normal University, Guilin 541004, China

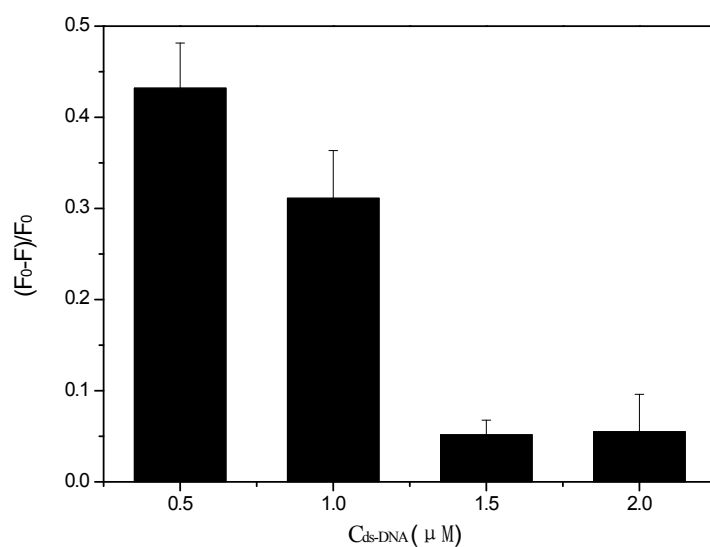

Fig. S1 The effect of concentrations of substrate of EcoRI on the relative fluorescence intensity  $((F_0-F)/F_0)$  of the DNA-AgNCs; Conditions of reaction:  $2.17 \times 10^{-3}$  U/ $\mu$ L EcoRI;  $F_0$  represented for the fluorescence intensity of blank sample,  $F$  represented for the fluorescence intensity with EcoRI. Error bars were calculated from three replicate measurements.

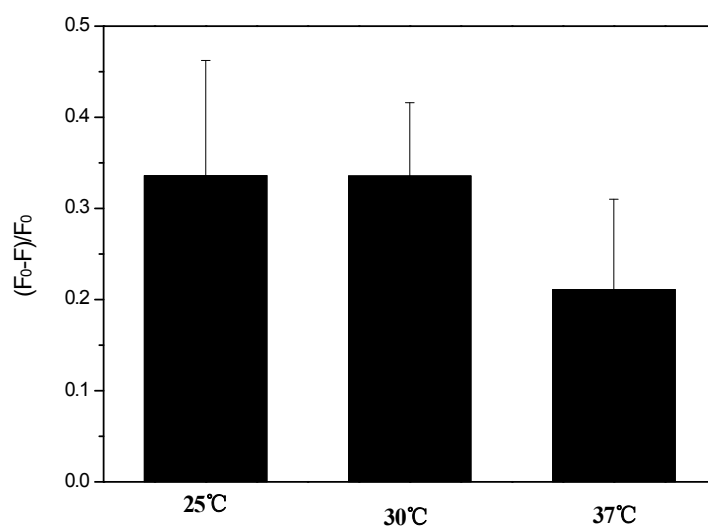

Fig. S2 The effect of reaction temperature of EcoRI on the relative fluorescence intensity  $((F_0-F)/F_0)$  of the DNA-AgNCs; Conditions of reaction: 1  $\mu$ M G-rich DNA, 1  $\mu$ M C-rich probe and  $2.17 \times 10^{-3}$  U/ $\mu$ L EcoRI;  $F_0$  represented for the fluorescence intensity of blank sample,  $F$  represented for the fluorescence intensity with EcoRI. Error bars were calculated from three replicate measurements.

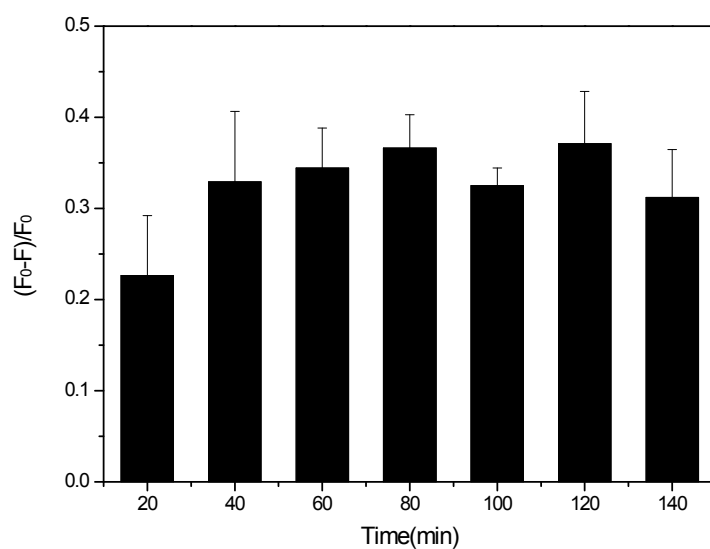

Fig. S3 The effect of reaction time of EcoRI on the relative fluorescence intensity  $((F_0 - F)/F_0)$  of the DNA-AgNCs; Conditions of reaction: 1  $\mu$ M G-rich DNA, 1  $\mu$ M C-rich probe and  $2.17 \times 10^{-3}$  U/ $\mu$ L EcoRI;  $F_0$  represented for the fluorescence intensity of blank sample,  $F$  represented for the fluorescence intensity with EcoRI. Error bars were calculated from three replicate measurements.

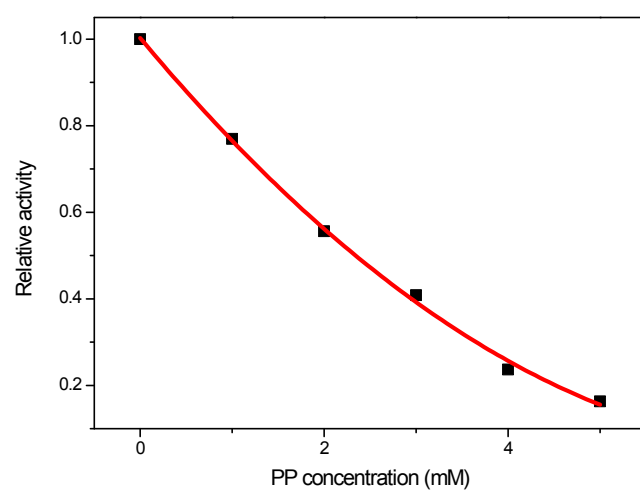

Fig. S4 The inhibition (Pyrophosphate) assay of EcoRI, Conditions of reaction: 1  $\mu$ M G-rich DNA, 1  $\mu$ M C-rich probe and  $1.09 \times 10^{-2}$  U/ $\mu$ L EcoRI, the concentrations of Pyrophosphate were 1 mM, 2 mM, 3 mM, 4 mM, 5 mM, respectively.

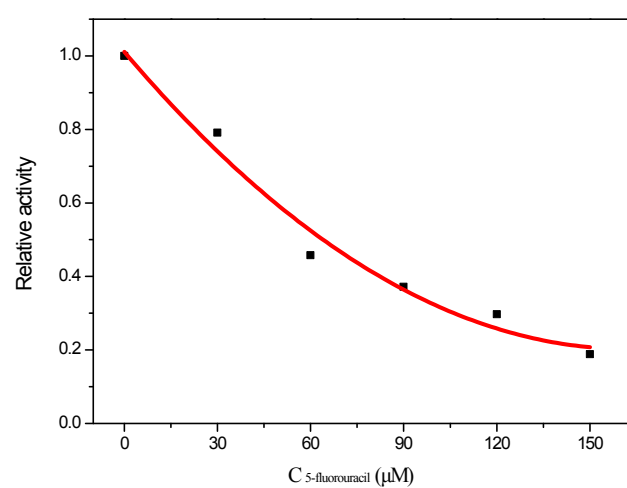

Fig. S5 The inhibition (5-fluorouracil) assay of EcoRI, Conditions of reaction: 1  $\mu$ M G-rich DNA, 1  $\mu$ M C-rich probe and  $1.09 \times 10^{-2}$  U/ $\mu$ L EcoRI, the concentrations of 5-fluorouracil were 30  $\mu$ M, 60  $\mu$ M, 90  $\mu$ M, 120  $\mu$ M, 150  $\mu$ M, respectively.

**Table S1 Recovery of EcoRI in spiked human serum samples**

| Samples | Added( U/ $\mu$ L)    | Found ( U/ $\mu$ L)   | Recovery (%) | RSD (% ,n=3) |
|---------|-----------------------|-----------------------|--------------|--------------|
| 1       | $4.34 \times 10^{-4}$ | $4.44 \times 10^{-4}$ | 102          | 5.7          |
| 2       | $1.09 \times 10^{-3}$ | $1.07 \times 10^{-3}$ | 98           | 8.0          |
| 3       | $1.74 \times 10^{-3}$ | $1.67 \times 10^{-3}$ | 96           | 1.2          |
| 4       | $2.17 \times 10^{-3}$ | $2.11 \times 10^{-3}$ | 97           | 3.2          |
| 5       | $6.52 \times 10^{-3}$ | $6.27 \times 10^{-3}$ | 96           | 3.8          |
| 6       | $1.09 \times 10^{-2}$ | $1.11 \times 10^{-2}$ | 102          | 2.3          |
